# Supplementary material
Source: publisher figshare collection journal article supplement (https://sage.figshare.com/ndownloader/files/13853897)
Supplement: Supplementary file 1 [file 13853897]

## ONLINE SUPPLEMENT

Priming operates based on implicit memory, wherein exposure to one source of stimulus activates other related parts of memory in associative networks. This occurs through a process of spreading activation whereby the activation of certain memory nodes initiates an implicit search through memory for related information, making those associated concepts more accessible from memory and thus more able to be recalled and accurately reported (Kihlstrom, Beer, & Klein, 2003). Self-identity is itself a memory structure which can be activated through such priming (Kihlstrom et al., 2003; Leavitt, Reynolds, Barnes, Schilpzand, & Hannah, 2012). Further, self-knowledge is comprised of both semantic and episodic memory (Kihlstrom et al., 2003; D'Argembeau & Salmon, 2012). Semantic memory entails general knowledge of one's self (e.g., I am just, responsible, etc.). Episodic memory instead entails memories of specific experiences, such as particular times one was just or helped others. In the current research, we are focused primarily on semantic representations of self-identity – how individuals construe themselves. Yet, the simultaneous activation of episodic/autobiographical memories help refine general beliefs about ourselves through recalling what/how we were feeling, thinking, and acting in certain situations (D'Argembeau & Salmon, 2012).

### Reference Not included in Main Manuscript

D'Argembeau, A., & Salmon, E. 2012. The neural basis of semantic and episodic forms of self-knowledge: insights from functional neuroimaging. In *Sensing in nature*: 276-290. Springer: United States.

**Table S1: *The original 28 items used for Sample 1***

|               |             |           |             |
|---------------|-------------|-----------|-------------|
| Accountable   | Dutiful     | Helpful   | Principled  |
| Caring        | Equitable   | Honest    | Reliable    |
| Committed     | Fair        | Honorable | Reputable   |
| Compassionate | Forthright  | Impartial | Responsible |
| Conscientious | Friendly    | Just      | Trustworthy |
| Dependable    | Generous    | Kind      | Truthful    |
| Disciplined   | Hardworking | Noble     | Virtuous    |

**Table S2 Panel A: Summary of fit indices (model with 4 dimensions, 12 attributes)**

| Sample<br>(sample size) | Role         | Chi-square<br>(deg. free) | <i>p</i> | <i>IFI</i> | <i>CFI</i> | <i>RMSEA</i> |
|-------------------------|--------------|---------------------------|----------|------------|------------|--------------|
| S1 & S2 (249)           | Son/Daughter | 111.75 (48)               | .000     | .95        | .95        | .073         |
| S1 & S2 (249)           | Friend       | 119.76 (48)               | .000     | .92        | .92        | .078         |
| S1 & S2 (249)           | Co-worker    | 86.72 (48)                | .001     | .96        | .95        | .057         |
| S1 & S2(249)            | Follower     | 96.71 (48)                | .000     | .96        | .96        | .064         |
| S3 (216)                | Employee     | 122.04 (48)               | .000     | .94        | .94        | .085         |
| S4 (157)                | Employee     | 94.84 (48)                | .000     | .95        | .95        | .079         |
| S5 (164)                | Son/Daughter | 121.83 (48)               | .000     | .90        | .90        | .097         |
| S5 (164)                | Employee     | 93.44 (48)                | .000     | .93        | .93        | .076         |

**Table S2 Panel B: Summary of fit indices (model with 1 dimension, 12 attributes)**

| Sample        | Role         | Chi-square<br>(deg. free) | <i>p</i> | <i>IFI</i> | <i>CFI</i> | <i>RMSEA</i> |
|---------------|--------------|---------------------------|----------|------------|------------|--------------|
| S1 & S2 (249) | Son/Daughter | 510.34 (54)               | .000     | .63        | .62        | .185         |
| S1 & S2 (249) | Friend       | 448.64 (54)               | .000     | .57        | .57        | .172         |
| S1 & S2 (249) | Co-worker    | 391.94 (54)               | .000     | .60        | .60        | .159         |
| S1 & S2(249)  | Follower     | 463.49 (54)               | .000     | .64        | .63        | .175         |
| S3 (216)      | Employee     | 670.14 (54)               | .000     | .48        | .48        | .230         |
| S4 (157)      | Employee     | 337.43 (54)               | .000     | .69        | .69        | .183         |
| S5 (164)      | Son/Daughter | 347.74 (54)               | .000     | .57        | .56        | .183         |
| S5 (164)      | Employee     | 355.80 (54)               | .000     | .52        | .52        | .185         |

**Table S2 Panel C: Chi-square tests of difference between models**

| Sample        | Role         | 1 Dimension<br>Chi-square<br>(deg. free) | 4 Dimension<br>Chi-square<br>(deg. free) | Difference<br>Chi-square<br>(deg. free) | <i>p</i> |
|---------------|--------------|------------------------------------------|------------------------------------------|-----------------------------------------|----------|
| S1 & S2 (249) | Son/Daughter | 510.34 (54)                              | 111.75 (48)                              | 398.59 (6)                              | .000     |
| S1 & S2 (249) | Friend       | 448.64 (54)                              | 119.76 (48)                              | 328.88 (6)                              | .000     |
| S1 & S2 (249) | Co-worker    | 391.94 (54)                              | 86.72 (48)                               | 305.22 (6)                              | .000     |
| S1 & S2(249)  | Follower     | 463.49 (54)                              | 96.71 (48)                               | 366.78 (6)                              | .000     |
| S3 (216)      | Employee     | 670.14 (54)                              | 122.04 (48)                              | 548.10 (6)                              | .000     |
| S4 (157)      | Employee     | 337.43 (54)                              | 94.84 (48)                               | 242.59 (6)                              | .000     |
| S5 (164)      | Son/Daughter | 347.74 (54)                              | 121.83 (48)                              | 225.91 (6)                              | .000     |
| S5 (164)      | Employee     | 355.79 (54)                              | 93.44 (48)                               | 262.35 (6)                              | .000     |

*Note:* In all samples and all roles, the model with four dimensions is a better fit than the model with one dimension. S = Sample. Sample sizes are shown in parentheses. The Chi-Square test of differences in Panel C are significant for all tests.

**Table S3: Dimension descriptive statistics, combined samples 1 & 2, and sample 5**

| Sample<br>(Sample size) | Role         | Benevolence | Justice    | Obligation | Integrity  |
|-------------------------|--------------|-------------|------------|------------|------------|
| S1 & S2 (249)           | Son/Daughter | 4.38 (.64)  | 3.99 (.67) | 4.47 (.59) | 4.37 (.73) |
| S1 & S2 (249)           | Friend       | 4.42 (.55)  | 4.04 (.62) | 4.44 (.54) | 4.53 (.57) |
| S1 & S2 (249)           | Co-worker    | 3.91 (.72)  | 4.14 (.55) | 4.67 (.44) | 4.54 (.52) |
| S1 & S2(249)            | Follower     | 3.86 (.78)  | 4.12 (.62) | 4.75 (.39) | 4.56 (.55) |
| S3 (216)                | Employee     | 4.24 (.72)  | 4.40 (.54) | 4.69 (.52) | 4.62 (.46) |
| S4 (157)                | Employee     | 4.30 (.64)  | 4.55 (.50) | 4.71 (.45) | 4.77 (.41) |
| S5 (164)                | Son/Daughter | 4.25 (.70)  | 4.00 (.63) | 4.44 (.62) | 4.29 (.67) |
| S5 (164)                | Employee     | 3.71 (.73)  | 4.64 (.50) | 4.15 (.55) | 4.51 (.55) |

*Note:* The score for each dimension was computed by adding the scores for each of the three items measuring each of the four dimensions and dividing by three. The values shown in the table represent the mean score for the dimension, with the standard deviation in parentheses. Patterns of mean differences for individual participants are more varied than the overall sample mean differences shown here.

S = Sample. Sample sizes are shown in parentheses.

**Table S4: Test of differences by dimension across roles, samples 1 & 2, and sample 5**

| Samples 1 & 2 Combined   | Benevolence       | Justice          | Obligation       | Integrity        |
|--------------------------|-------------------|------------------|------------------|------------------|
| Son/Daughter – Friend    | -.62<br>(.54)     | -1.33<br>(.18)   | -.96<br>(.34)    | -3.30**<br>(.00) |
| Son/Daughter – Co-worker | -8.81**<br>(.00)  | -3.67**<br>(.00) | -5.22**<br>(.00) | -3.42**<br>(.00) |
| Son/Daughter – Follower  | -8.72**<br>(.00)  | -3.20**<br>(.00) | -6.99**<br>(.00) | -3.81**<br>(.00) |
| Friend – Co-worker       | -10.63**<br>(.00) | -3.13**<br>(.00) | -6.42**<br>(.00) | -0.23<br>(.82)   |
| Friend – Follower        | -9.59**<br>(.00)  | -2.39*<br>(.02)  | -7.99**<br>(.00) | -0.72<br>(.47)   |
| Co-worker – Follower     | -1.29<br>(.20)    | -0.77<br>(.44)   | -3.33**<br>(.00) | -0.72<br>(.47)   |
| <b>Sample 5</b>          |                   |                  |                  |                  |
| Son/Daughter - Employee  | -7.56**<br>(.00)  | -3.57**<br>(.00) | -3.86**<br>(.00) | -4.63**<br>(.00) |

*Note:* The values shown are the z-scores from a Wilcoxon Sign-Test comparing differences in scores for each dimension across all possible pairs of roles. The p-values are shown in parentheses below the associated z-score \*\* $p < .01$ ; \* $p < .05$

**Table S5 Panel A: Influence of overall moral identity on overall deviance (Sample 1)**

|                         | Model 1     |          |          |             | Model 2     |          |          |             | Model 3     |          |          |             |
|-------------------------|-------------|----------|----------|-------------|-------------|----------|----------|-------------|-------------|----------|----------|-------------|
|                         | <i>Beta</i> | <i>t</i> | <i>p</i> | <i>Part</i> | <i>Beta</i> | <i>t</i> | <i>p</i> | <i>Part</i> | <i>Beta</i> | <i>t</i> | <i>p</i> | <i>Part</i> |
| Age                     | -.11        | -1.01    | .31      | -.09        | -.08        | -.79     | .43      | -.07        | .01         | .09      | .93      | .01         |
| Gender                  | -.06        | -.69     | .49      | -.06        | -.07        | -.76     | .45      | -.07        | -.10        | -1.23    | .22      | -.10        |
| Education               | .16         | 1.57     | .12      | .14         | .14         | 1.35     | .18      | .12         | .11         | 1.14     | .26      | .09         |
| Aquino-Intern           |             |          |          |             | -.16        | -1.81    | .07      | -.17        |             |          |          |             |
| Overall MI              |             |          |          |             |             |          |          |             | -.46**      | -5.44    | .00      | -.45        |
| Adjusted R <sup>2</sup> | .00         |          |          |             | .02         |          |          |             | .20         |          |          |             |
| Δ R <sup>2</sup>        | .00         |          |          |             | .02*        |          |          |             | .20**       |          |          |             |

**Table S5 Panel B: Influence of overall moral identity on overall deviance (Sample 2)**

|                         | Model 1     |          |          |             | Model 2     |          |          |             | Model 3     |          |          |             |
|-------------------------|-------------|----------|----------|-------------|-------------|----------|----------|-------------|-------------|----------|----------|-------------|
|                         | <i>Beta</i> | <i>t</i> | <i>p</i> | <i>Part</i> | <i>Beta</i> | <i>t</i> | <i>p</i> | <i>Part</i> | <i>Beta</i> | <i>t</i> | <i>p</i> | <i>Part</i> |
| Age                     | -.07        | -.81     | .42      | -.07        | -.05        | -.52     | .61      | -.05        | .03         | .41      | .68      | .03         |
| Gender                  | -.08        | -.89     | .38      | -.08        | -.06        | -.66     | .51      | -.06        | -.06        | -.69     | .49      | -.06        |
| Education               | .06         | .66      | .51      | .06         | .02         | .22      | .83      | .02         | .01         | .08      | .94      | .01         |
| Aquino-Intern           |             |          |          |             | -.30**      | -3.43    | .00      | -.30        |             |          |          |             |
| Overall MI              |             |          |          |             |             |          |          |             | -.48**      | -5.79    | .00      | -.47        |
| Adjusted R <sup>2</sup> | -.01        |          |          |             | .08         |          |          |             | .20         |          |          |             |
| Δ R <sup>2</sup>        | -.01        |          |          |             | .09**       |          |          |             | .21**       |          |          |             |

**Table S5 Panel C: Influence of overall moral identity on overall ethical intentions (Sample 2)**

|                         | Model 1     |          |          |             | Model 2     |          |          |             | Model 3     |          |          |             |
|-------------------------|-------------|----------|----------|-------------|-------------|----------|----------|-------------|-------------|----------|----------|-------------|
|                         | <i>Beta</i> | <i>t</i> | <i>p</i> | <i>Part</i> | <i>Beta</i> | <i>t</i> | <i>p</i> | <i>Part</i> | <i>Beta</i> | <i>t</i> | <i>p</i> | <i>Part</i> |
| Age                     | .19*        | 2.09     | .04      | .19         | .16         | 1.90     | .06      | .16         | .11         | 1.26     | .21      | .10         |
| Gender                  | .03         | .37      | .71      | .03         | -.01        | -.12     | .91      | -.01        | .01         | .08      | .94      | .01         |
| Education               | -.10        | -1.07    | .29      | -.10        | -.05        | -.62     | .53      | -.05        | -.04        | -.528    | .61      | -.04        |
| Aquino-Intern           |             |          |          |             | .41**       | 4.91     | .00      | .40         |             |          |          |             |
| Overall MI              |             |          |          |             |             |          |          |             | .41**       | 4.81     | .00      | .40         |
| Adjusted R <sup>2</sup> | .03         |          |          |             | .18         |          |          |             | .17         |          |          |             |
| Δ R <sup>2</sup>        | .03         |          |          |             | .15**       |          |          |             | .14**       |          |          |             |

*Note:* Sample sizes range from 121 for Sample 1 and from 124 to 125 for Sample 2 due to missing values. The values shown represent standardized beta estimates and adjusted R<sup>2</sup> values. Aquino-Intern is the 5-item Internalization scale from Aquino & Reed (2002). A single score was computed by averaging the responses to the five items. MI = Moral Identity. Overall MI is our Overall MI Mean measure (see Figure 1). We computed a single score by averaging the responses to the 12 items across each of the four roles. “Part” is the semi-partial correlation. \* $p < .05$ , \*\* $p < .01$ .

**Table S6 Panel A: Influence of overall moral identity on overall deviance (Sample 1)**

|                         | Model 1     |          |          |             | Model 2     |          |          |             | Model 3     |          |          |             |
|-------------------------|-------------|----------|----------|-------------|-------------|----------|----------|-------------|-------------|----------|----------|-------------|
|                         | <i>Beta</i> | <i>t</i> | <i>p</i> | <i>Part</i> | <i>Beta</i> | <i>t</i> | <i>p</i> | <i>Part</i> | <i>Beta</i> | <i>t</i> | <i>p</i> | <i>Part</i> |
| Age                     | -.11        | -1.01    | .31      | -.09        | -.08        | -.79     | .43      | -.07        | .01         | .10      | .92      | .01         |
| Gender                  | -.06        | -.69     | .49      | -.06        | -.07        | -.76     | .45      | -.07        | -.10        | -1.23    | .22      | -.10        |
| Education               | .16         | 1.57     | .12      | .14         | .14         | 1.35     | .18      | .12         | .11         | 1.11     | .27      | .09         |
| Aquino-Intern           |             |          |          |             | -.16        | -1.81    | .07      | -.16        | -.02        | -.24     | .82      | -.02        |
| Overall MI              |             |          |          |             |             |          |          |             | -.45**      | -5.06    | .00      | -.42        |
| Adjusted R <sup>2</sup> | .00         |          |          |             | .02         |          |          |             | .19         |          |          |             |
| Δ R <sup>2</sup>        | .00         |          |          |             | .02*        |          |          |             | .17**       |          |          |             |

**Table S6 Panel B: Influence of overall moral identity on overall deviance (Sample 2)**

|                         | Model 1     |          |          |             | Model 2     |          |          |             | Model 3     |          |          |             |
|-------------------------|-------------|----------|----------|-------------|-------------|----------|----------|-------------|-------------|----------|----------|-------------|
|                         | <i>Beta</i> | <i>t</i> | <i>p</i> | <i>Part</i> | <i>Beta</i> | <i>t</i> | <i>p</i> | <i>Part</i> | <i>Beta</i> | <i>t</i> | <i>p</i> | <i>Part</i> |
| Age                     | -.07        | -.81     | .42      | -.07        | -.05        | -.52     | .61      | -.05        | .04         | .44      | .66      | .04         |
| Gender                  | -.08        | -.89     | .38      | -.08        | -.06        | -.66     | .51      | -.06        | -.05        | -.58     | .56      | -.05        |
| Education               | .06         | .66      | .51      | .06         | .02         | .22      | .83      | .02         | -.01        | -.11     | .91      | -.01        |
| Aquino-Intern           |             |          |          |             | -.30**      | -3.43    | .00      | -.30        | -.15        | -1.70    | .09      | -.14        |
| Overall MI              |             |          |          |             |             |          |          |             | -.41**      | -4.68    | .00      | -.38        |
| Adjusted R <sup>2</sup> | -.01        |          |          |             | .08         |          |          |             | .21         |          |          |             |
| Δ R <sup>2</sup>        | -.01        |          |          |             | .09**       |          |          |             | .21**       |          |          |             |

**Table S6 Panel C: Influence of overall moral identity on ethical intentions (Sample 2)**

|                         | Model 1     |          |          |             | Model 2     |          |          |             | Model 3     |          |          |             |
|-------------------------|-------------|----------|----------|-------------|-------------|----------|----------|-------------|-------------|----------|----------|-------------|
|                         | <i>Beta</i> | <i>t</i> | <i>p</i> | <i>Part</i> | <i>Beta</i> | <i>t</i> | <i>p</i> | <i>Part</i> | <i>Beta</i> | <i>t</i> | <i>p</i> | <i>Part</i> |
| Age                     | .19*        | 2.09     | .04      | .19         | .16         | 1.90     | .06      | .16         | .10         | 1.28     | .20      | .10         |
| Gender                  | .03         | .37      | .71      | .03         | -.01        | -.12     | .91      | -.01        | -.02        | -.24     | .81      | -.02        |
| Education               | -.10        | -1.07    | .29      | -.10        | -.05        | -.62     | .53      | -.05        | -.02        | -.27     | .79      | -.02        |
| Aquino-Intern           |             |          |          |             | .41**       | 4.91     | .00      | .40         | .30**       | 3.48     | .00      | .28         |
| Overall MI              |             |          |          |             |             |          |          |             | .29**       | 3.37     | .00      | .27         |
| Adjusted R <sup>2</sup> | .03         |          |          |             | .18         |          |          |             | .24         |          |          |             |
| Δ R <sup>2</sup>        | .03         |          |          |             | .15**       |          |          |             | .06**       |          |          |             |

*Note:* Sample sizes range from 121 for Sample 1 and from 124 to 125 for Sample 2 due to missing values. The values shown represent standardized beta estimates and adjusted R<sup>2</sup> values. Aquino-Intern is the 5-item Internalization scale from Aquino & Reed (2002). A single score was computed by averaging the responses to the five items. MI = Moral Identity. Overall MI is our Overall MI Mean measure (see Figure 1). We computed a single score by averaging the responses to the 12 items across each of the four roles. MI = Moral Identity. “Part” is the semi-partial correlation. \* $p < .05$ , \*\* $p < .01$ .
